# Supplementary material for: Dual endogenous stimuli-responsive polyplex micelles as smart two-step delivery nanocarriers for deep tumor tissue penetration and combating drug resistance of cisplatin
Source: Royal Society of Chemistry journal article supplement (doi:10.1039/c3tb21383h), 2014-01-01
Supplement: c3tb21383h.pdf [file c3tb21383h.pdf]

## Supplementary Information for:

**Dual endogenous stimuli-responsive polyplex micelles as smart two-step delivery nanocarriers for deep tumor tissue penetration and combating drug resistance of cisplatin**

**Junjie Li,<sup>a</sup> Yu Han,<sup>a</sup> Qixian Chen,<sup>\*b</sup> Hongdong Shi,<sup>c</sup> Saif ur Rehman,<sup>d</sup> Mohammad Siddiq,<sup>d</sup> Yangzhong Liu,<sup>c</sup> Zhishen Ge<sup>\*a</sup> and Shiyong Liu<sup>a</sup>**

<sup>a</sup> *CAS Key Laboratory of Soft Matter Chemistry, Department of Polymer Science and Engineering, University of Science and Technology of China, Hefei, Anhui 230026, China*

<sup>b</sup> *Department of Materials Engineering, Graduate School of Engineering, The University of Tokyo, 7-3-1 Hongo, Bunkyo-ku, Tokyo 113-8656, Japan*

<sup>c</sup> *CAS Key Laboratory of Soft Matter Chemistry, Department of Chemistry, University of Science and Technology of China, Hefei, Anhui 230026, China*

<sup>d</sup> *Department of Chemistry, Quaid-I-Azam University, Islamabad 45320, Pakistan*

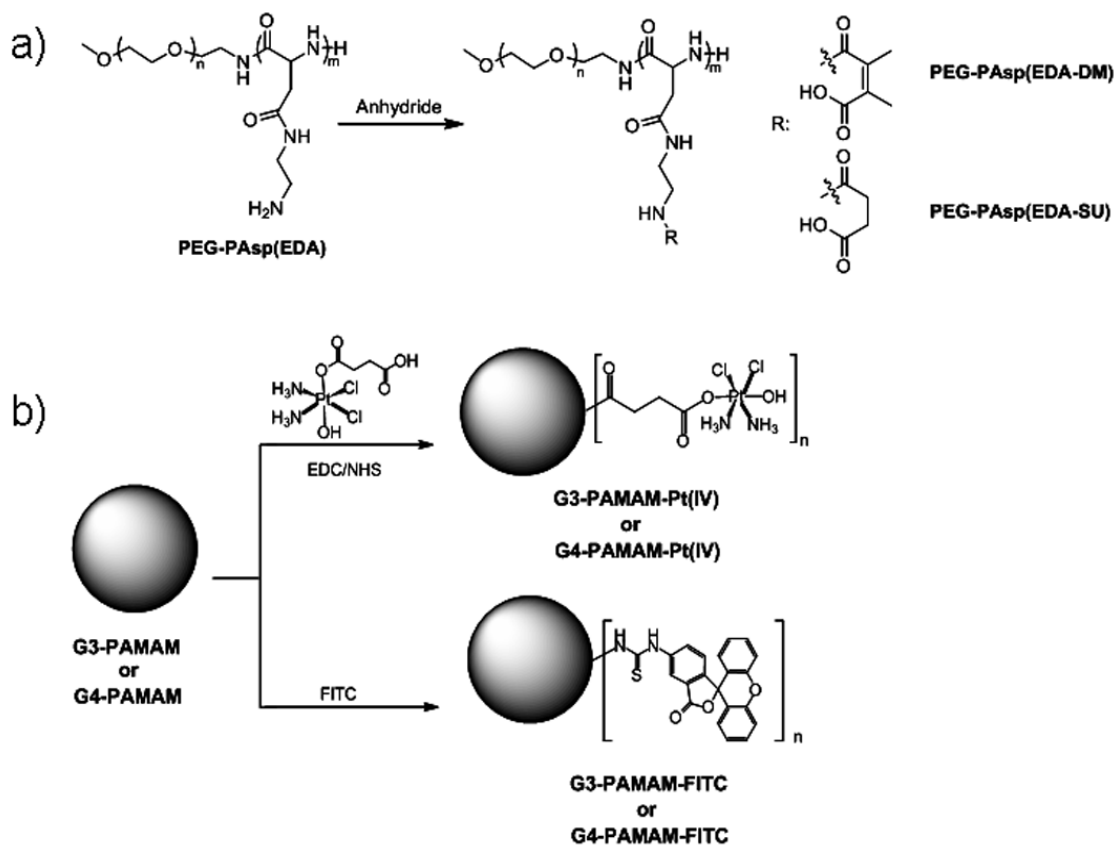

**Scheme S1.** Synthetic routes for the preparation of (a) block copolymers, PEG-PAsp(EDA-DM) and PEG-PAsp(EDA-SU), and (b) Pt(IV) or FITC-conjugated PAMAM dendrimers.

**Table S1. DLS characterization of the polyplex micelles prepared from the complexation between PEG-PAsp(EDA-DM) and PAMAM-Pt(IV).**

| Polyplex micelles                                               | Diameter / nm | $\mu_2/\Gamma^2$ |
|-----------------------------------------------------------------|---------------|------------------|
| PEG <sub>273</sub> -PAsp(EDA-DM) <sub>68</sub> /G3-PAMAM-Pt(IV) | 140.2         | 0.212            |
| PEG <sub>273</sub> -PAsp(EDA-DM) <sub>68</sub> /G4-PAMAM-Pt(IV) | 165.7         | 0.173            |
| PEG <sub>454</sub> -PAsp(EDA-DM) <sub>96</sub> /G3-PAMAM-Pt(IV) | 142.3         | 0.091            |
| PEG <sub>454</sub> -PAsp(EDA-DM) <sub>96</sub> /G4-PAMAM-Pt(IV) | 222.5         | 0.092            |

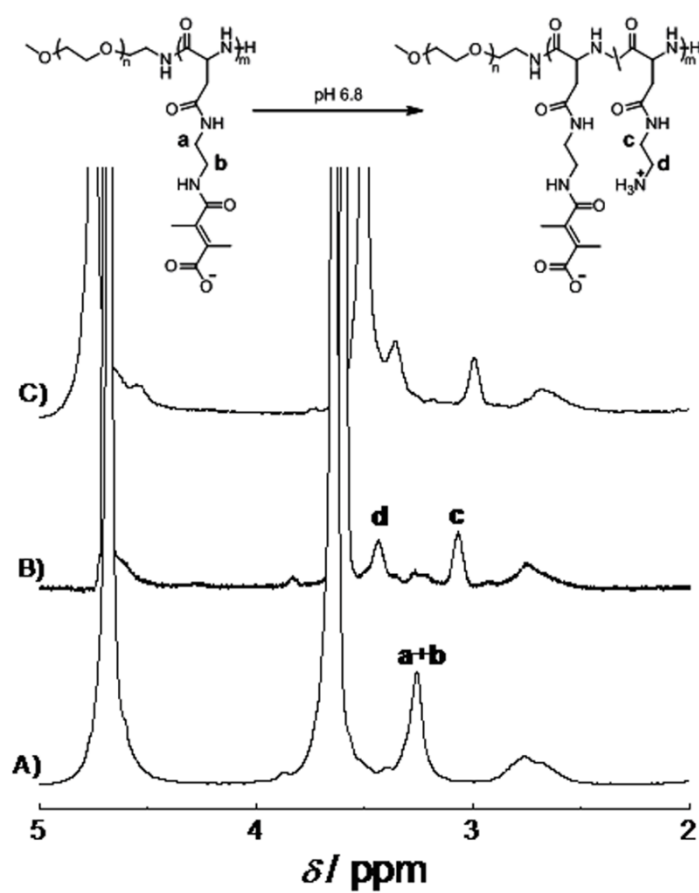

**Fig. S1.** <sup>1</sup>H NMR spectra recorded for PEG-PAsp(EDA-DM) block copolymer in D<sub>2</sub>O at pH 6.8 after incubation for varying times (A: 0 min, B: 60 min, and C: 120 min).

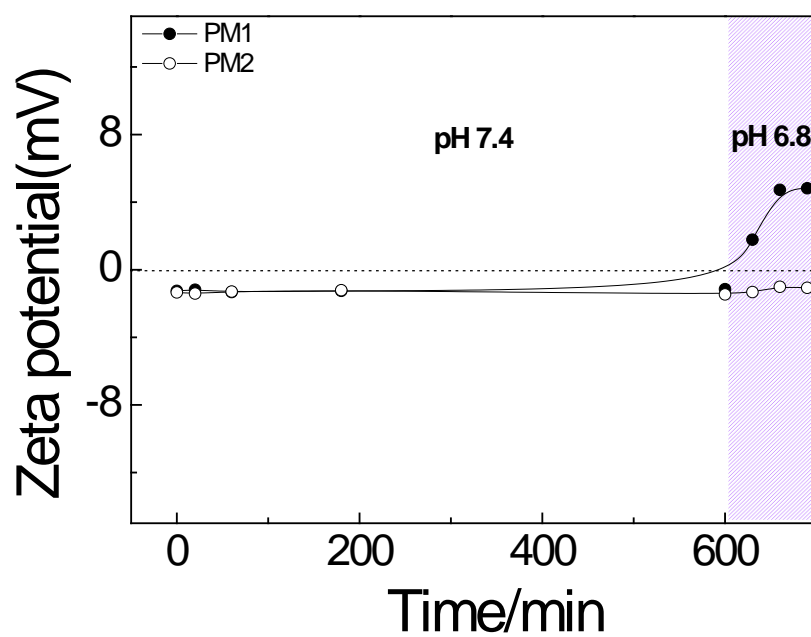

**Fig. S2.** Time-dependent  $\zeta$ -potential of **PM1** and **PM2** at pH 6.8 or pH 7.4 in 10 mM PBS buffer.

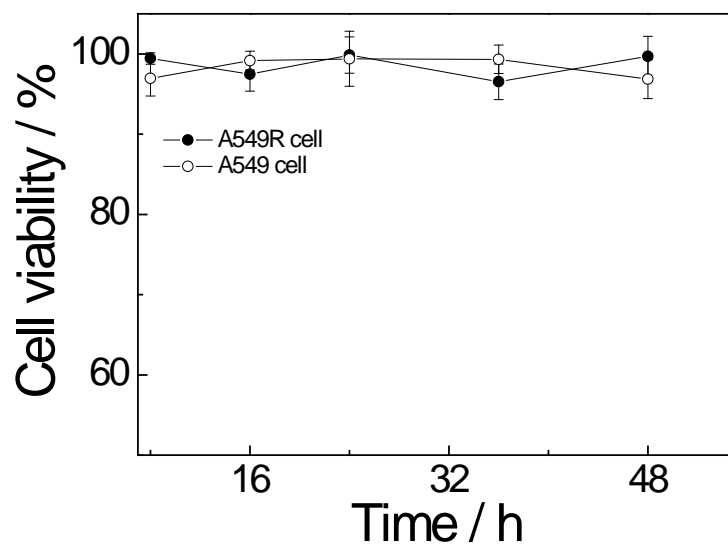

**Fig. S3.** Cell viability of A549R (closed circles) and A549 cells (open circles) cultured in the medium at pH 6.8 (mean  $\pm$  SEM, n = 4).

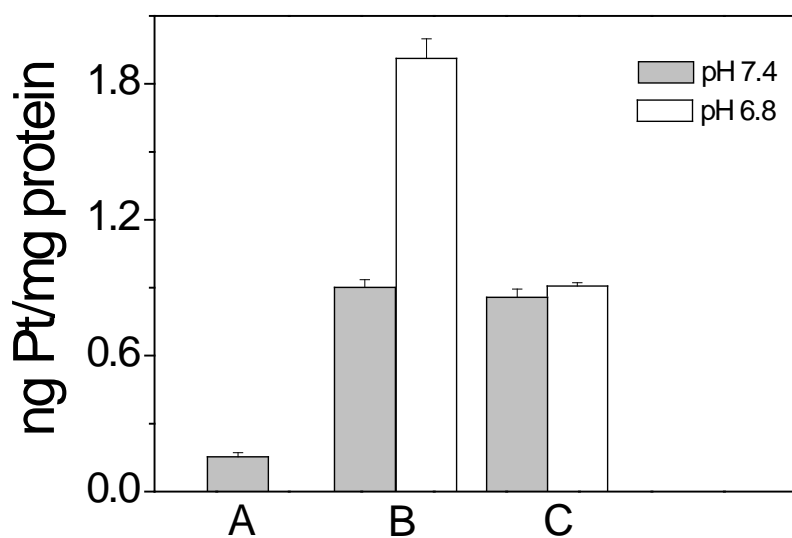

**Fig. S4.** The cellular uptake of platinum against A549R cells after incubation with cisplatin (A), **PM1** (B) and **PM2** (C) for 3 hours at pH 7.4 or pH 6.8. The total amount of cellular protein was determined from a BCA Protein Assay to normalize Pt content in cells by ICP-MS (mean  $\pm$  SEM,  $n = 4$ ).
